# Supplementary material
Source: HighWire-hosted journal article supplement (https://bmjopen.bmj.com/content/14/8/e085932)
Supplement: inline-supplementary-material-1 [file inline-supplementary-material-1.pdf]

SUPPLEMENTARY TABLE 1 SCHEMATIC OVERVIEW OF QUESTIONNAIRE

|        | Interviews                                                                                                                                                                                                            | Topic                                                              | Questionnaire                                                                                                             |
|--------|-----------------------------------------------------------------------------------------------------------------------------------------------------------------------------------------------------------------------|--------------------------------------------------------------------|---------------------------------------------------------------------------------------------------------------------------|
| Part 1 |                                                                                                                                                                                                                       | Demographics                                                       | Age, marital status, children at home, educational level, ethnicity                                                       |
| Part 2 | Definition of wait time<br>Minimum and maximum wait time                                                                                                                                                              | Duration of and opinion on wait time                               | Duration of own wait times<br>Opinion on own wait time<br>Minimally and maximally acceptable wait times                   |
| Part 3 | Factors that impact wait time acceptability: expectations, trust, distance to hospital, physician preference                                                                                                          | Relative importance of wait time compared to other aspects of care | Ranking 11 factors that impact quality of care                                                                            |
| Part 4 | Factors that impact wait time acceptability: Emotional distress, pain, severity of illness<br><br>Impact of wait time on various dimensions : family life, activities, working, sleeping, pain, emotional well being. | Quality of life and activities during wait time                    | HADS questionnaire<br>Sleeping pattern<br>Pain scores<br>Physical complaints<br>Time spent on activities during wait time |
